1  
2  
3  
4  
5  
6  
7  
8  
9  
10  
11  
12  
13  
14  
15  
16  
17  
18  
19  
20  
21  
22

**High levels of antibiotic tolerance and persistence are induced by the  
commercial anti-microbial triclosan**

Corey S. Westfall and Petra Anne Levin\*

Department of Biology, Washington University in St. Louis, St. Louis, MO 63130, USA

\*Correspondence: [plevin@wustl.edu](mailto:plevin@wustl.edu)

23 **Antimicrobial tolerance and bacterial persistence are confounding factors in the treatment**  
24 **of recurrent and chronic infections. Here we report that the anti-microbial triclosan**  
25 **increased antibiotic tolerance up to 10,000 fold and amplified persister populations in both**  
26 ***Escherichia coli* and methicillin-resistant *Staphylococcus aureus*. Triclosan-mediated**  
27 **protection was dependent on the alarmone ppGpp but independent of growth rate, arguing**  
28 **against a simplistic model in which slow growth is sufficient to confer antibiotic tolerance.**

29

30 The prophylactic use of antibiotics in consumer goods ranging from animal feed to personal care  
31 products is widely believed to be a major contributor to the epidemic increase in antibiotic  
32 resistant pathogens<sup>1-3</sup>. While the inverse relationship between antibiotic use and antibiotic  
33 efficacy is largely attributable to the selection of heritable traits, non-heritable traits such as  
34 antibiotic tolerance and persistence are also likely to be involved<sup>4</sup>.

35

36 In contrast to genetically resistant bacteria, which grow in the presence of an antibiotic, tolerant  
37 bacteria are able to survive antibiotic challenge for longer periods of time than their more  
38 sensitive counterparts<sup>5</sup>. Persister cells are the small sub-set of an otherwise-sensitive population  
39 ( $\sim 1$  in  $10^6$ ) that exhibit levels of tolerance sufficient to protect them from otherwise lethal  
40 concentrations of antimicrobial compounds<sup>6</sup>. Increases in antibiotic tolerance and persistence are  
41 confounding factors in the treatment of chronic *P. aeruginosa*<sup>7</sup> and *S. aureus*<sup>8</sup> infections and are  
42 thought to contribute to the refractile nature of medically relevant biofilms. Reduced growth rate  
43 is associated with increased antibiotic tolerance<sup>9</sup> and is a defining trait of persister cells.

44

45 Banned from consumer soaps effective September 2017 by the US Food and Drug  
46 Administration, the antimicrobial triclosan remains approved for use in products ranging from  
47 toothpaste to cleansers employed in healthcare settings<sup>10</sup>. In contrast to bactericidal antibiotics,  
48 which kill pathogens outright, triclosan is a bacteriostatic drug that inhibits growth by targeting  
49 enoyl-acyl carrier protein reductase to interfere with early steps in fatty acid synthesis<sup>11</sup>.  
50  
51 Based on its ability to inhibit growth, we wondered if physiologically relevant levels of triclosan  
52 might provide protection against bactericidal antibiotics. To address this possibility we examined  
53 the relative sensitivity of *E. coli* (MG1655) and *S. aureus* (FPR3757 an USA-300 MRSA strain)  
54 cultured in minimal inhibitory concentrations (MIC) of triclosan to a panel of bactericidal  
55 antibiotics. Triclosan MICs for *E. coli* and MRSA were 200 ng/mL and 100 ng/mL, respectively  
56 under our growth conditions, equivalent to the urine concentration of individuals using triclosan-  
57 containing consumer products<sup>12,13</sup>. In all cases, triclosan was added 30 minutes prior to the  
58 addition of the specified bactericidal antibiotic and both antibiotics maintained in the culture for  
59 the remainder of the experiment.  
60  
61 We utilized two approaches to evaluate the impact of triclosan on bacterial tolerance and  
62 persistence: a qualitative, end-point plating efficiency assay and a quantitative kinetic kill-curve.  
63 Plating efficiency assesses relative antimicrobial tolerance and the kinetic kill-curve  
64 distinguishes between changes in total antibiotic tolerance and changes in persister frequency<sup>4</sup>.  
65  
66 Triclosan had a dramatic protective effect on *E. coli* in the end point assay, increasing survival  
67 by several orders of magnitude in the presence of three bactericidal antibiotics and providing

68 nearly complete protection against a fourth (Figure 1). *E. coli* treated with triclosan exhibited a  
69 1000-fold increase in survival in the presence of 50 µg/mL (~5x MIC) kanamycin, an inhibitor of  
70 peptide bond formation, and a 10,000-fold increase in survival in the presence of streptomycin  
71 (50 µg /mL: ~2x MIC), an inhibitor of tRNA-ribosome interaction, and ciprofloxacin (100  
72 ng/mL: ~3x MIC) a gyrase inhibitor. (Figure 1). Strikingly, triclosan rendered *E. coli* almost  
73 completely refractile to treatment with the cell wall active antibiotic ampicillin (100 µg /mL;  
74 ~10x MIC). Viable cell numbers were essentially identical in triclosan and triclosan-ampicillin  
75 treated cultures at 2 hours, and 10% of cells in triclosan-ampicillin cultures were viable at 20  
76 hours, suggesting triclosan qualitatively increased persister frequency.

77  
78 To further assess the protective effect of Triclosan, we next performed a kinetic kill curve, in  
79 which we measured colony forming units (CFU) over a 20-hour time, focusing on ciprofloxacin,  
80 the broad spectrum antibiotic used to treat *E. coli* related UTIs. Consistent with the results of the  
81 end point assay, triclosan substantially protected *E. coli* from ciprofloxacin-induced cell death  
82 throughout the duration of the time course. Protection was particularly pronounced at the 2-hour  
83 time point, where the slope of the kill curve for pre-treated cells diverges substantially from that  
84 of untreated cells (Figure 2). A divergent slope is diagnostic for the presence of persister cells in  
85 the pre-treated population<sup>13</sup>.

86  
87 Persister population size was proportional to the concentration of the bacteriocidal antibiotic:  
88 10% of triclosan treated cells cultured at 100 ng/mL ciprofloxacin remained viable at 2 hours,  
89 while only 0.1% cultured at the more clinically relevant 1,000 ng/mL ciprofloxacin were viable  
90 at the same time point. For perspective, 0.1% of the population is equivalent to 1 in 10<sup>3</sup> cells,

91 1000-fold higher than the expected frequency of persisters in an untreated population<sup>4</sup>. At the 20  
92 hour time point, 90,000 cells per mL were viable in 100 ng/mL ciprofloxacin and 30 cells per  
93 mL in 1000ng/mL ciprofloxacin. In contrast, we observed only 20 cells/ml after 20 hours of  
94 growth in 100 ng/mL ciprofloxacin alone. Cells cultured in 1,000 ng/mL ciprofloxacin alone had  
95 no observable colonies (<10 cells per mL).

96  
97 Remarkably, triclosan also protected MRSA cells from high concentration of the cell wall  
98 inhibitor vancomycin over the course of a 20-hour experiment (Figure 2C). MRSA treated with  
99 100 ng/ml of triclosan were essentially refractile to 50 ng/ml vancomycin (10x the MIC) at 4  
100 hours and exhibited a viable cell count 200-times that of untreated cells at 8 hours. Although not  
101 statistically significant, at 20 hours the viable cell count was several times higher in the presence  
102 of both triclosan and vancomycin than vancomycin alone (360,000 +/- 200,000 cells/ml versus  
103 130,000 +/- 80,000 cells/ml), consistent with induction of a persistent state.

104  
105 The ability of triclosan to protect cells from bactericidal antibiotics appears to be independent of  
106 its impact on bacterial growth rate. Instead, genetic data support a model in which triclosan-  
107 mediated tolerance stems from accumulation of the alarmone ppGpp in response to defects in  
108 fatty acid synthesis<sup>15</sup>. ppGpp has been repeatedly implicated in antibiotic tolerance and  
109 persistence in several organisms including *E. coli* and *S. aureus*<sup>14-16</sup>. To determine the  
110 contribution of ppGpp accumulation to triclosan mediated tolerance, we compared the relative  
111 viability of wild type and ppGpp<sup>0</sup> (*spoT::cat ΔrelA*) *E. coli* cells after 2 hours antibiotic  
112 challenge in the presence or absence of triclosan. Triclosan was unable to substantially protect  
113 ppGpp<sup>0</sup> cells from either ampicillin or ciprofloxacin (Figure 2E). For kanamycin and

114 streptomycin, the ppGpp<sup>0</sup> cells showed no viable cells after 2 hours for both the triclosan-treated  
115 and untreated cells. In contrast to previous studies which relied on either carbon starvation or the  
116 addition of serine hydroxamate to induce accumulation of high concentrations of ppGpp [100x  
117 above baseline]<sup>16</sup>, defects in fatty acid synthesis have at best a modest impact on ppGpp  
118 levels[~5x over baseline]<sup>17</sup>. Thus even relatively low levels of the alarmone appear to be  
119 sufficient to protect cells from a panel of antimicrobials.

120

121 Triclosan inhibited growth in the presence and absence of the alarmone, arguing against a  
122 simplistic model in which reductions in growth rate are inherently protective (Figure 2F).  
123 Specifically how modest increases in [ppGpp] might confer tolerance to different antibiotics thus  
124 remains an open question. We favor the idea that rather than exerting a global effect, ppGpp  
125 mediates changes in individual biosynthetic pathways that render them tolerant of their cognate  
126 antimicrobial. For example, ppGpp-dependent down regulation of ribosomal RNA synthesis  
127 significantly curtails translation, conferring resistance to the translational inhibitors kanamycin  
128 and streptomycin. Similarly, increases in [ppGpp] are reported to curtail DNA replication—both  
129 elongation and initiation—providing a straightforward explanation for ppGpp-mediated  
130 ciprofloxacin resistance.

131

132 Regardless of mechanism, these data highlight an unexpected and potentially important role for  
133 triclosan as a contributor to antibiotic tolerance and persistence in both community and health  
134 care settings. While the impact of triclosan on persistence and tolerance *in vivo* remains an open  
135 question, the high concentration of the compound in the urine of individuals using triclosan-  
136 containing products raises the possibility that it might interfere with treatment of bladder and

137 kidney associated infections. Along with previous work identifying a connection between  
138 triclosan exposure and antibiotic resistance<sup>18,19</sup>, our findings reinforce the need for substantial  
139 caution—as well as consideration of unintended consequences—in evaluating the costs and  
140 benefit of antimicrobial additives in consumer products.

141

## 142 **Methods**

### 143 **Materials and Strains**

144 Triclosan, ampicillin, kanamycin, streptomycin, ciprofloxacin, and vancomycin were purchased  
145 from Sigma-Aldrich. Stock solutions were made in water for ampicillin (100 mg/mL),  
146 kanamycin (50 mg/mL), streptomycin (100 mg/mL) and ciprofloxacin (10 mg/mL). Triclosan  
147 was dissolved in ethanol (10 mg/mL), and vancomycin was dissolved in DMSO (100 mg/mL). *E.*  
148 *coli* MG1655 and *S. aureus* FPR3575 were both lab strains. The ppGpp0 strain was created by  
149 transducing spoT::cat (the kind gift of Dr. Jue D. Wang) and relA::kan<sup>20</sup> into MG1655 using the  
150 bacteriophage P1*vir*. To test kanamycin tolerance of the ppGpp0, we first cured the kanamycin  
151 cassette using pCP20, and the pCP20 plasmid was then removed through growth of multiple  
152 generations at 42°C<sup>21</sup>. *E. coli* was grown in Luria-Bertani broth (LB) and *S. aureus* was grown  
153 in tryptic soy broth (TSB). Growth temperature was 37°C for all experiments.

154

### 155 **Determination of Minimum Inhibitory Concentration (MIC)**

156 To determine the MIC for the panel of antibiotics utilized in this study, *E. coli* and *S. aureus*  
157 were grown to OD<sub>600</sub> = 0.1 in LB or TSB respectively. Cells were then back-diluted 1000-fold  
158 and transferred to a 96-well plate containing 2-fold dilutions of respective antibiotics and  
159 cultured at 37° for 16 additional hours with vigorous shaking in a BioTek Eon plate reader. MIC

160 was calculated as the lowest antibiotic concentration preventing development of detectable  
161 turbidity at OD-600.

162

### 163 **Assays for antibiotic Tolerance and Persistence**

164 To assay tolerance and persistence, *E. coli* and *S. aureus* were grown to an OD 600 = 0.2 in LB  
165 or TSB respectively. Cells were then back-diluted into media containing triclosan at indicated  
166 concentrations to an OD-600 = 0.1, cultured for an additional 30 minutes, before being  
167 challenged with bactericidal antibiotics. For dot plating, 10  $\mu$ L of a 10-fold dilution series was  
168 plated on antibiotic free LB-agar or TSB-agar as appropriate. For determination of colony  
169 forming units (CFU), 100  $\mu$ L of a 10-fold dilution series was spread on antibiotic free LB-agar or  
170 TSB-agar plates. Cells were incubated for ~12 hours at 37° prior to quantification. CFUs were  
171 normalized to CFUs at t0 to correct for the ~2-fold increase in cell number in untreated cultures  
172 during the 30 minute pre-treatment period. Relative persistence is defined as the CFU's of the  
173 triclosan treated sample divided by the CFU's of the non-treated sample.

174

### 175 **Growth Curve**

176 MG1655 and MG1655 ppGpp<sup>0</sup> cells were grown to an OD600=0.1-0.2 in LB before back-  
177 diluting to an OD600=0.02 into LB with or without 200 ng/mL triclosan. Growth was monitored  
178 every 30 minutes at OD600.

179

### 180 **Statistical Analysis**

181 All values are expressed as the mean  $\pm$  standard deviation of n=3 replicates. Data was analyzed  
182 using a one-tailed Student's t-test. Statistical significance was determined when p<.05.



183

184

185 **Acknowledgements**

186 This work was supported by National Institutes of Health grants GM64671 to P.A.L. C.S.W was  
187 supported by an Arnold O. Beckman Postdoctoral Fellowship. The authors thank Dr. Robyn  
188 Klein and members of the Levin and Zaher groups for insightful suggestions and critical  
189 comments on the manuscript. We are grateful to Dr. Jue Wang for the kind gift of the *spoT::cat*  
190 strain.

191

192 **Author Contributions**

193 C.S.W. and P.A.L designed the experiments. C.S.W. performed the experiments. C.S.W. and  
194 P.A.L. analyzed the data and prepared the manuscript.

195 **References**

196  
197  
198  
199  
200  
201  
202  
203  
204  
205  
206  
207  
208  
209  
210  
211  
212  
213  
214  
215  
216  
217  
218  
219  
220  
221  
222

1. Bell, B.G. *et al. BMC Infections Diseases* **14**, 13 (2014).
2. McEwen, S.A. & Fedorka-Cray, P.J. *Clin. Infect. Dis.* **34**, S93-106 (2002).
3. Yazdankhaha, S.P. *et al. Microb. Drug Resist.* **12**, 83-90 (2006).
4. Lewis, K. *Annu. Rev. Microbiol.* **64**, 357-372 (2010).
5. Brauner, A., Fridan, O., Gefen, O., & Balaban, N.Q. *Nat. Rev. Microbiol.* **14**, 320-330 (2016).
6. Bigger, J.W. *Lancet* **244**, 497-500 (1944).
7. Mulcahy, L.R., Burns, J.L., Lory, S., & Lewis, K. *J. Bacteriol.* **192**, 6191-6199 (2010).
8. Proctor, R.A. *et al. Clin. Infect. Dis.* **20**, 95-102 (1995).
9. Balaban, N.Q. *et al. Science* **305**, 1622-1625 (2004).
10. FDA Safety and Effectiveness of Consumer Antiseptics; Topical Antimicrobial Drug Products for Over-the-Counter Human Use, 21 C.F.R. § 310 (2016).
11. McMurry, L.M., Oethinger, M., & Levy, S.B. *Nature* **394**, 531-532 (1998).
12. Calafat, A.M. *et al. Environ. Health Perspect.* **116**, 303-307 (2008).
13. MacIsaac, J.K. *et al. J. Occup. Environ. Med.* **56**, 834-839 (2014).
14. Nguyen, D. *et al. Science* **334**, 982-986 (2011).
15. Battesti, A. & Bouveret E. *Mol Microbiol.* **62**, 1048-1063 (2006).
16. Maisonneuve, E., Castro-Camargo M., Gerdes, K. *Cell* **154**, 1140-1150 (2013).
17. Seyfzadeh, M., Keener, J., & Nomura, M. *PNAS* **90**, 11004-8 (1993).
18. Karatzas K.A. *et al. J. Antimicrob. Chemother.* **60**, 947-955 (2007).
19. Webber, M.A., Randall, L.P., Cooles, S., Woodward, M.J., Piddock L.J. *J. Antimicrob. Chemother.* **62**, 83-91 (2008).
20. Baba T. *et al. Mol. Syst. Biol.* **2**, 2006.0008 (2006).
21. Cherepanov, P.P. & Wackernagel W. *Gene* **156**, 9-14 (1995).

223  
224  
225  
226  
227  
228  
229  
230  
231

232

233 **Figures**

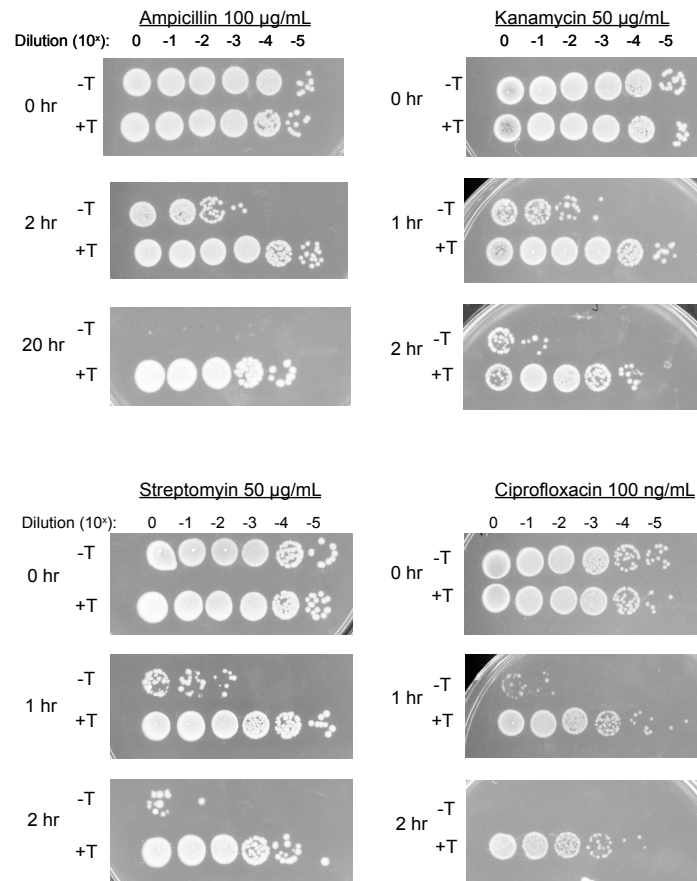

239

240

241

242

243

244

245

246

247

248

249 **Figure 1: Triclosan induces tolerance to multiple antibiotics.** *E. coli* (MG1655) were cultured

250 to OD<sub>600</sub> = 0.2, split and cultured for an additional 30 minutes with (+T) or without 200ng/ml

251 triclosan (-T). Indicated bactericidal antibiotics were then added and cells cultured for an

252 additional 2 to 20 hours prior to dilution plating. Each experiment was replicated three

253 independent times with only representative data shown.

254

255

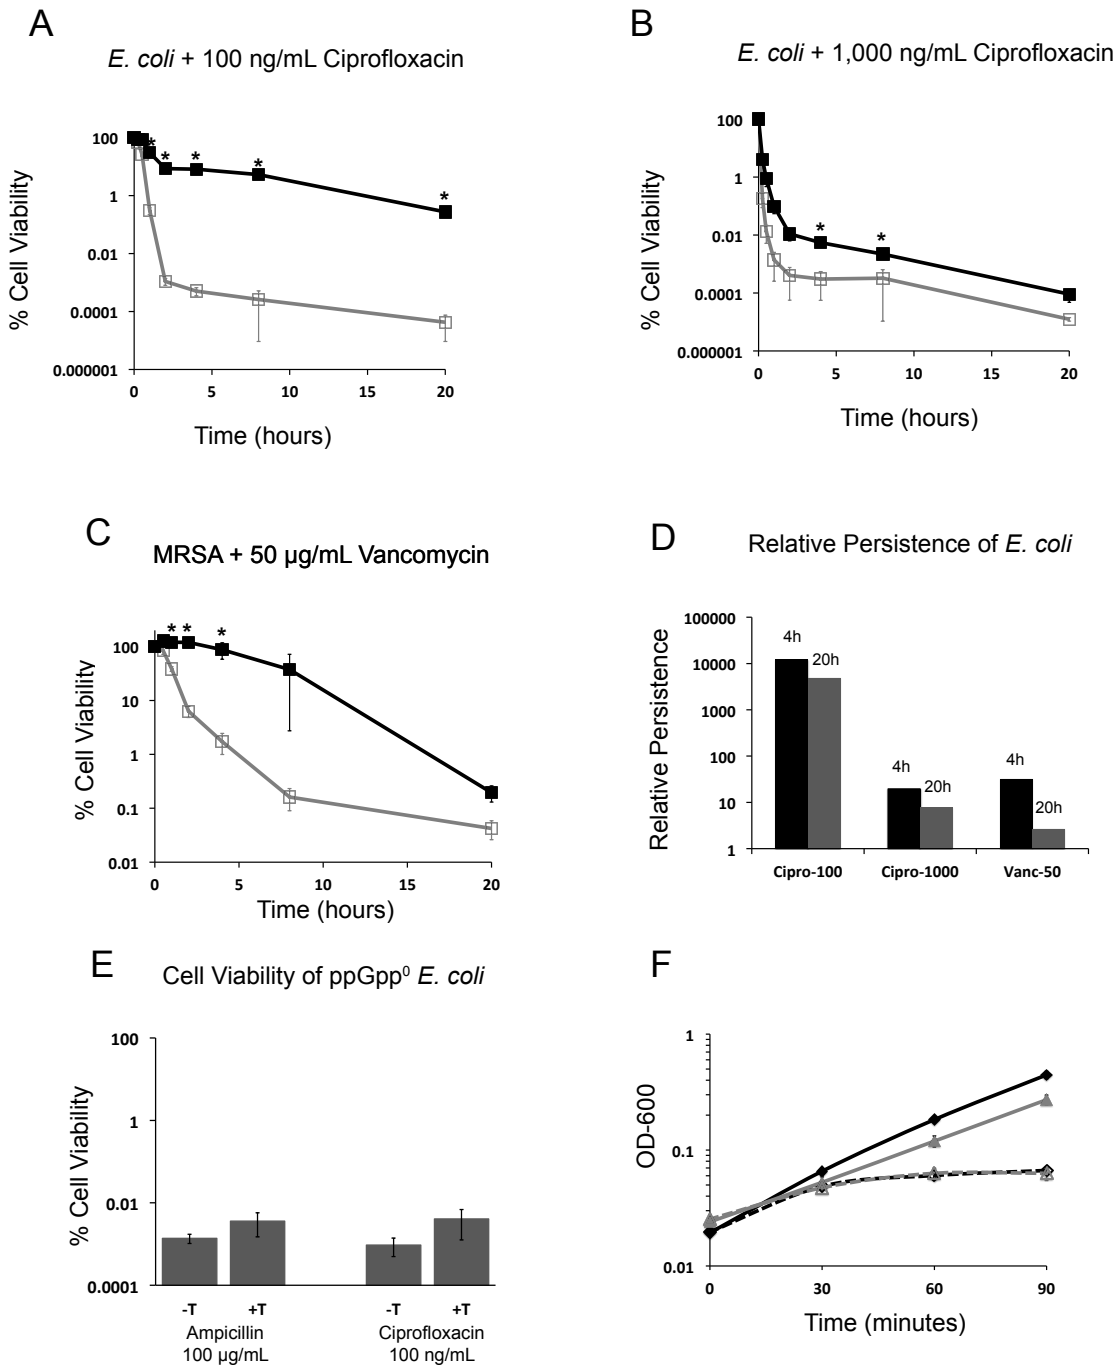

256

257

258 **Figure 2: Kinetic analysis of triclosan-induced persistence.** *E. coli* (MG1655) and MRSA

259 (FPR3757) cells were cultured to OD600 = 0.2, split and cultured for an additional 30 minutes

260 with (black line, closed squares) or without triclosan (grey line, open squares). At  $t=0$ , 100  
261 ng/mL (A) or 1  $\mu\text{g/mL}$  ciprofloxacin (B) was added to *E. coli* cultures and 50ng/ml vancomycin  
262 was added to MRSA cultures (C). Relative persistence in the presence of triclosan  
263 (CFU+T/CFU-T) was calculated for the 4 and 20 hour time points (D). Cell viability of ppGpp<sup>0</sup>  
264 *E. coli* with (+T) or without (-T) pretreatment with triclosan after 2 hour challenge with  
265 ampicillin or vancomycin (E). Growth curves of MG1655 (black curve) or ppGpp<sup>0</sup> (gray curve)  
266 in LB with (dashed lines) or without (solid lines) triclosan (F). Values are the mean of three  
267 independent biological replicates with error bars indicating one standard deviation. Asterisks  
268 represent significant difference between the triclosan treated and non-treated using a Student's t-  
269 test with  $p < 0.05$ .
